# Supplementary material for: Halide mediated modulation of magnetic interaction and anisotropy in dimeric Co(ii) complexes
Source: Royal Society of Chemistry journal article supplement (doi:10.1039/d4dt00927d), 2024-01-01
Supplement: d4dt00927d1.pdf [file d4dt00927d1.pdf]

## **SUPPLEMENTARY INFORMATION**

### **Table of Contents**

| <b>Table/<br/>Figure No.</b> | <b>Name</b>                                                                                                                                                                                                                 | <b>Page No.</b> |
|------------------------------|-----------------------------------------------------------------------------------------------------------------------------------------------------------------------------------------------------------------------------|-----------------|
| <b>Figure S1.</b>            | Representation of complexes <b>2</b> & <b>3</b> by wire or stick model.                                                                                                                                                     | <b>S2</b>       |
| <b>Figure S2.</b>            | Packing diagram for complexes <b>1</b> (top), <b>2</b> (middle) and <b>3</b> (bottom).                                                                                                                                      | <b>S2-S3</b>    |
| <b>Table S1.</b>             | Crystal data and structure refinement parameters for complexes <b>1</b> , <b>2</b> and <b>3</b> .                                                                                                                           | <b>S3</b>       |
| <b>Table S2.</b>             | Comparison of bond lengths (Å) around Co <sup>II</sup> center in complexes <b>1-3</b> .                                                                                                                                     | <b>S5</b>       |
| <b>Table S3.</b>             | BVS Calculations for the Co1 and Co2 centers.                                                                                                                                                                               | <b>S6</b>       |
| <b>Figure S3.</b>            | PXRD of Complexes <b>1 – 3</b>                                                                                                                                                                                              |                 |
| <b>Table S4.</b>             | Continuous Shape Measurements ( <i>CShM</i> ) for complexes <b>1-3</b> .                                                                                                                                                    | <b>S7-S8</b>    |
| <b>Figure S3.</b>            | <i>M</i> ( <i>H</i> ) Hysteresis plots for <b>1-3</b> using a scan rate of 2.0 mTs <sup>-1</sup> .                                                                                                                          | <b>S8</b>       |
| <b>Figure S4.</b>            | Field dependences of magnetization in the field range 0–70 kOe at 2 K temperature for <b>1-3</b> .                                                                                                                          |                 |
| <b>Figure S5.</b>            | <i>M</i> ( <i>H</i> ) Hysteresis plots for <b>1-3</b> using a scan rate of 2.0 mTs <sup>-1</sup>                                                                                                                            | <b>S9</b>       |
| <b>Figure S6.</b>            | Plots of ac susceptibility vs. temperature                                                                                                                                                                                  | <b>S9</b>       |
| <b>Figure S7.</b>            | Plots of ac susceptibility vs. applied field from 0–10 kOe                                                                                                                                                                  | <b>S9</b>       |
| <b>Figure S8.</b>            | Molecular structure of <b>2</b> overlaid with a) <i>D</i> -tensors axes calculated with CASSCF/NEVPT2 on the left, b) three-dimensional molar magnetization calculated at <i>T</i> = 2 K and <i>B</i> = 0.1 T on the right. | <b>S10</b>      |
| <b>Figure S9.</b>            | Molecular structure of <b>3</b> overlaid with a) <i>D</i> -tensors axes calculated with CASSCF/NEVPT2 on the left, b) three-dimensional molar magnetization calculated at <i>T</i> = 2 K and <i>B</i> = 0.1 T on the right. | <b>S10</b>      |
| <b>Figure S10.</b>           | Magnetization reversal blocking barrier of pentagonal-bipyramidal Co <sup>II</sup> ion (a) and tetrahedral Co <sup>II</sup> ion (b) in <b>2-3</b> calculated by CASSCF/NEVPT2/SINGLE_ANISO.                                 | <b>S11</b>      |
| <b>Figure S11.</b>           | The POLY_ANISO module analysis for <b>2</b>                                                                                                                                                                                 |                 |

Figure S12.

The POLY\_ANISO module analysis for 3

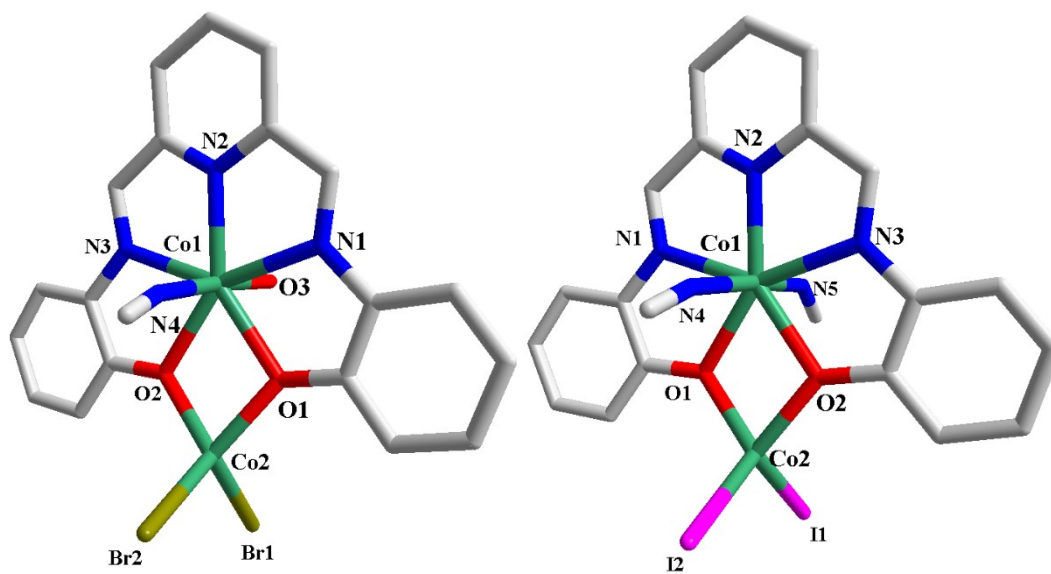

Figure S1. Representation of complexes 2 & 3 by wire or stick model.

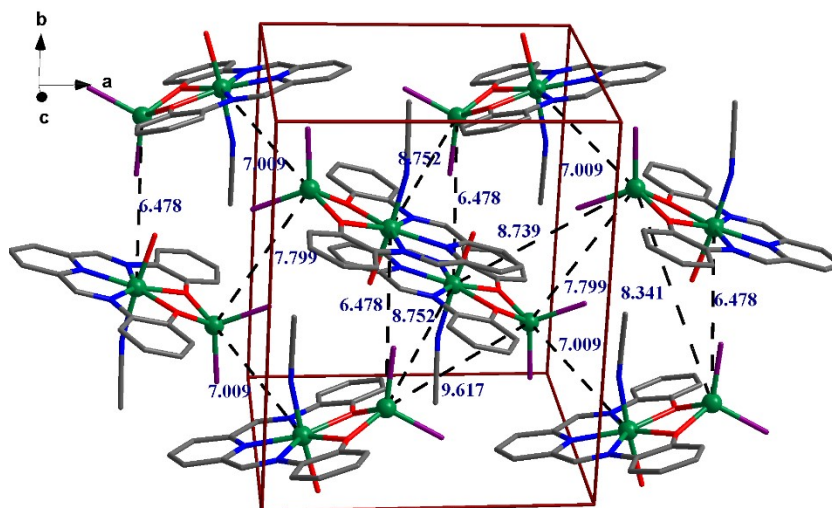

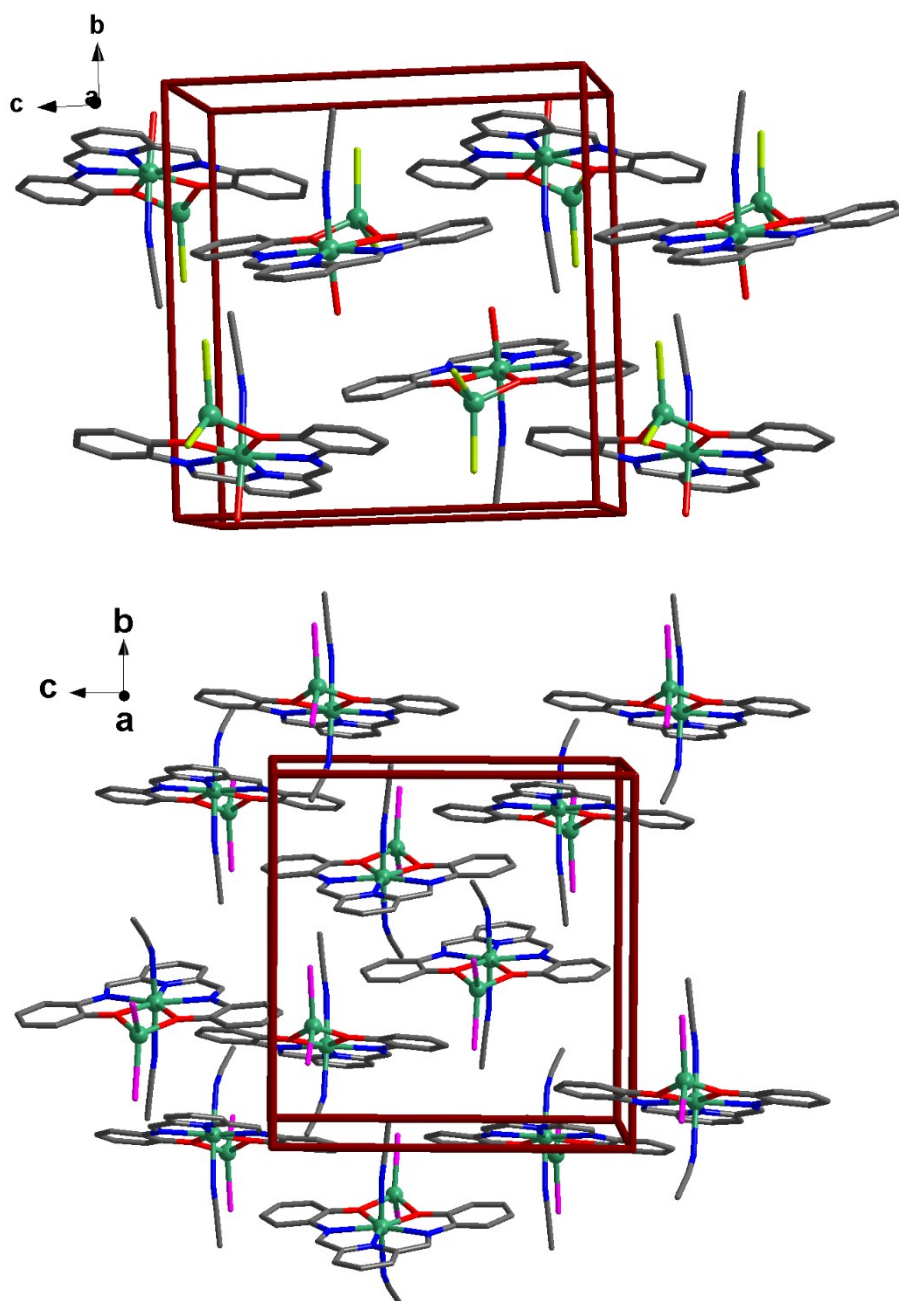

**Figure S2.** Packing diagram for complexes **1** (top), **2** (middle) and **3** (bottom).

**Table S1.** Crystal data and structure refinement parameters for complexes **1**, **2** and **3**.

|                   | <b>1</b>                     | <b>2</b>                     | <b>3</b>                    |
|-------------------|------------------------------|------------------------------|-----------------------------|
| Empirical formula | $C_{21}H_{20}Cl_2Co_2N_4O_4$ | $C_{21}H_{20}Br_2Co_2N_4O_4$ | $C_{23}H_{19}I_2Co_2N_5O_2$ |
| Formula weight    | 581.17                       | 670.09                       | 769.09                      |
| Temperature/K     | 273.15                       | 105.0                        | 298.0                       |
| Crystal system    | Monoclinic                   | Monoclinic                   | Monoclinic                  |

|                                               |                                                                       |                                                                       |                                                                       |
|-----------------------------------------------|-----------------------------------------------------------------------|-----------------------------------------------------------------------|-----------------------------------------------------------------------|
| Space group                                   | $P2_1/n$                                                              | $P2_1/n$                                                              | $P2_1/n$                                                              |
| $a/\text{\AA}$                                | 12.068(3)                                                             | 12.3152(7)                                                            | 12.8418(7)                                                            |
| $b/\text{\AA}$                                | 14.316(3)                                                             | 14.3406(8)                                                            | 14.6125(8)                                                            |
| $c/\text{\AA}$                                | 13.869(3)                                                             | 13.8984(7)                                                            | 14.0835(8)                                                            |
| $\alpha/^\circ$                               | 90                                                                    | 90                                                                    | 90                                                                    |
| $\beta/^\circ$                                | 95.056(6)                                                             | 93.729(2)                                                             | 92.407(2)                                                             |
| $\gamma/^\circ$                               | 90                                                                    | 90                                                                    | 90                                                                    |
| Volume/ $\text{\AA}^3$                        | 2386.9(10)                                                            | 2449.4(2)                                                             | 2640.4(3)                                                             |
| $Z$                                           | 4                                                                     | 4                                                                     | 4                                                                     |
| $\rho_{\text{calc}}/\text{g/cm}^3$            | 1.617                                                                 | 1.817                                                                 | 1.935                                                                 |
| $\mu/\text{mm}^{-1}$                          | 1.649                                                                 | 14.732                                                                | 3.624                                                                 |
| $F(000)$                                      | 1716.0                                                                | 1320.0                                                                | 1472.0                                                                |
| Crystal size/ $\text{mm}^3$                   | $0.076 \times 0.055 \times 0.043$                                     | $0.4 \times 0.2 \times 0.18$                                          | $0.16 \times 0.15 \times 0.14$                                        |
| Radiation                                     | $\text{MoK}_\alpha$ ( $\lambda = 0.71073$ )                           | $\text{CuK}_\alpha$ ( $\lambda = 1.54178$ )                           | $\text{MoK}_\alpha$ ( $\lambda = 0.71073$ )                           |
| $2\theta$ range for data collection/ $^\circ$ | 5.692 to 56.636                                                       | 8.87 to 133.34                                                        | 4.018 to 50.996                                                       |
| Index ranges                                  | $-16 \leq h \leq 16, -19 \leq k \leq 19, -18 \leq l \leq 18$          | $-14 \leq h \leq 14, -17 \leq k \leq 17, -16 \leq l \leq 16$          | $-15 \leq h \leq 15, -17 \leq k \leq 17, -17 \leq l \leq 17$          |
| Reflections collected                         | 37251                                                                 | 45670                                                                 | 62636                                                                 |
| Independent reflections                       | 5930<br>[ $R_{\text{int}} = 0.0542,$<br>$R_{\text{sigma}} = 0.0346$ ] | 4319<br>[ $R_{\text{int}} = 0.0648,$<br>$R_{\text{sigma}} = 0.0351$ ] | 4918<br>[ $R_{\text{int}} = 0.0465,$<br>$R_{\text{sigma}} = 0.0202$ ] |
| Data/restraints/parameters                    | 5930/0/303                                                            | 4319/0/304                                                            | 4918/11/309                                                           |
| Goodness-of-fit on $F^2$                      | 1.080                                                                 | 1.080                                                                 | 1.142                                                                 |
| Final $R$ indexes<br>[ $I > 2\sigma(I)$ ]     | $R_1 = 0.0345,$                                                       | $R_1 = 0.0663,$<br>$wR_2 = 0.1838$                                    | $R_1 = 0.0824,$                                                       |

|                                                   |                                  |                                 |                                  |
|---------------------------------------------------|----------------------------------|---------------------------------|----------------------------------|
|                                                   | $wR_2=0.0801$                    |                                 | $wR_2=0.2556$                    |
| Final $R$ indexes<br>[all data]                   | $R_1= 0.0478,$<br>$wR_2= 0.0894$ | $R_1= 0.0707,$<br>$wR_2=0.1876$ | $R_1= 0.0952,$<br>$wR_2= 0.2787$ |
| Largest diff.<br>peak/hole / $e \text{ \AA}^{-3}$ | 1.09/-0.94                       | 1.24/-2.10                      | 1.73/-2.90                       |

**Table S2.** Comparison of bond lengths ( $\text{\AA}$ ) around  $\text{Co}^{\text{II}}$  center in complexes **1–3**.

| Bond Length                                                  | 1                          | 2                          | 3                          |
|--------------------------------------------------------------|----------------------------|----------------------------|----------------------------|
| Co1-N <sub>imino</sub>                                       | 2.213(2) –<br>2.2239(19)   | 2.217(5) –<br>2.219(5)     | 2.218(7) –<br>2.219(7)     |
| Co1-N <sub>pyridine</sub>                                    | 2.145(2)                   | 2.141(5)                   | 2.132(8)                   |
| Co1-O <sub>phenolate</sub>                                   | 2.1632(17) –<br>2.1676(17) | 2.164(4) –<br>2.165(5)     | 2.150(7) –<br>2.159(6)     |
| Co1-N <sub>acetonitrile</sub>                                | 2.134(2)                   | 2.134(6)                   | 2.162(9) –<br>2.177(11)    |
| Co1-O <sub>water</sub>                                       | 2.1742(18)                 | 2.179(5)                   | -                          |
| Co2-O <sub>phenolate</sub>                                   | 1.9448(17) –<br>1.9522(16) | 1.937(4) –<br>1.938(4)     | 1.931(6) –<br>1.943(6)     |
| Co2-X <sub>halogen</sub>                                     | 2.2536(9) –<br>2.2641(9)   | 2.3285(14) -<br>2.3543(13) | 2.4240(19) –<br>2.5074(17) |
| O <sub>phenolate</sub> -Co1-<br>O <sub>phenolate</sub>       | 70.16(6)                   | 70.26(16)                  | 70.8(2)                    |
| O <sub>phenolate</sub> -Co2-<br>O <sub>phenolate</sub>       | 79.39(7)                   | 80.03(19)                  | 80.2(3)                    |
| X <sub>halogen</sub> -Co2-X <sub>halogen</sub>               | 110.71(3)                  | 110.47(6)                  | 115.91(7)                  |
| Co1-O <sub>phenolate</sub> -Co2                              | 103.67(7)                  | 103.53(19)                 | 103.9(3)                   |
| N <sub>acetonitrile</sub> -Co1-<br>O <sub>water</sub>        | 175.57(8)                  | 176.0(2)                   | -                          |
| N <sub>acetonitrile</sub> -Co1-<br>N <sub>acetonitrile</sub> | -                          | -                          | 175.7(4)                   |

**Table S3:** BVS Calculations for the Co1 and Co2 centers.

|                 | Co1-<br>N <sub>imino</sub> | Co1-<br>N <sub>imino</sub> | Co1-<br>N <sub>pyridine</sub> | Co1-<br>O <sub>phenolate</sub> | Co1-<br>O <sub>phenolate</sub> | Co1-<br>N <sub>acetonitrile</sub> | Co1-<br>N <sub>acetonitrile</sub> | Co1-<br>O <sub>water</sub> | Total<br>BVS |
|-----------------|----------------------------|----------------------------|-------------------------------|--------------------------------|--------------------------------|-----------------------------------|-----------------------------------|----------------------------|--------------|
| Bond Length (1) | 2.213                      | 2.2239                     | 2.145                         | 2.1632                         | 2.1676                         | 2.134                             |                                   | 2.1742                     |              |
| BVS(1)          | 0.243                      | 0.236                      | 0.295                         | 0.279                          | 0.276                          | 0.301                             |                                   | 0.271                      | 1.901        |
| Bond Length (2) | 2.217                      | 2.219                      | 2.141                         | 2.164                          | 2.165                          | 2.134                             |                                   | 2.179                      |              |
| BVS (2)         | 0.242                      | 0.240                      | 0.297                         | 0.279                          | 0.278                          | 0.303                             |                                   | 0.268                      | 1.907        |
| Bond            | 2.218                      | 2.219                      | 2.132                         | 2.150                          | 2.159                          | 2.162                             | 2.163                             |                            |              |

|            |       |       |       |       |       |       |       |  |       |
|------------|-------|-------|-------|-------|-------|-------|-------|--|-------|
| Length (3) |       |       |       |       |       |       |       |  |       |
| BVS (3)    | 0.241 | 0.240 | 0.304 | 0.290 | 0.281 | 0.280 | 0.280 |  | 1.916 |

|                 | Co2-O <sub>phenolate</sub> | Co2-O <sub>phenolate</sub> | Co2-X | Co2-X | Total BVS |
|-----------------|----------------------------|----------------------------|-------|-------|-----------|
| Bond Length (1) | 2.031                      | 2.032                      | 2.205 | 2.215 |           |
| BVS (1)         | 0.398                      | 0.399                      | 0.628 | 0.612 | 2.03      |
| Bond Length (2) | 2.0256                     | 2.0478                     | 2.193 | 2.212 |           |
| BVS (2)         | 0.406                      | 0.382                      | 0.649 | 0.616 | 2.05      |
| Bond Length (3) | 2.020                      | 2.032                      | 2.184 | 2.205 |           |
| BVS (3)         | 0.412                      | 0.399                      | 0.664 | 0.628 | 2.10      |

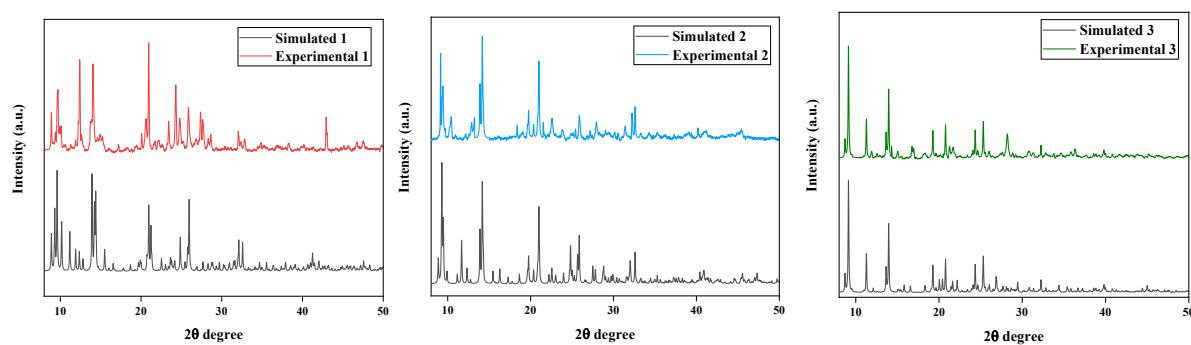

**Figure S3.** PXRD of Complexes 1 – 3.

**Table S4.** Continuous Shape Measurements (*CShM*) for complexes 1–3.

### Co<sub>2</sub>Cl<sub>2</sub>

S H A P E v2.0      Continuous Shape Measures calculation

(c) 2010 Electronic Structure Group, Universitat de Barcelona

Contact: llunell@ub.edu

HP-7      1 D7h Heptagon  
 HPY-7     2 C6v Hexagonal pyramid  
 PBPY-7    3 D5h Pentagonal bipyramid  
 COC-7     4 C3v Capped octahedron  
 CTPR-7    5 C2v Capped trigonal prism  
 JPBPY-7   6 D5h Johnson pentagonal bipyramid J13  
 JETPY-7   7 C3v Johnson elongated triangular pyramid J7

| Structure [ML7]<br>JETPY-7 | HP-7      | HPY-7   | PBPY-7 | COC-7  | CTPR-7 | JPBPY-7 |
|----------------------------|-----------|---------|--------|--------|--------|---------|
| vani<br>24.559             | , 34.459, | 25.460, | 0.062, | 8.110, | 6.265, | 3.444,  |

SP-4      1 D4h Square  
 T-4       2 Td Tetrahedron  
 SS-4      3 C2v Seesaw

| Structure [ML4 ] | SP-4      | T-4    | SS-4  |
|------------------|-----------|--------|-------|
| vani             | , 26.881, | 3.567, | 9.360 |

### Co<sub>2</sub>Br<sub>2</sub>

| Structure [ML7 ]<br>JETPY-7 | HP-7      | HPY-7   | PBPY-7 | COC-7  | CTPR-7 | JPBPY-7 |
|-----------------------------|-----------|---------|--------|--------|--------|---------|
| vani<br>24.621              | , 34.824, | 25.575, | 0.056, | 8.107, | 6.339, | 3.470,  |

| Structure [ML4 ] | SP-4      | T-4    | SS-4   |
|------------------|-----------|--------|--------|
| vani             | , 28.113, | 3.749, | 10.111 |

### Co<sub>2</sub>I<sub>2</sub>



Structure [ML7 ]      HP-7      HPY-7      PBPY-7      COC-7      CTPR-7      JPBPY-7  
 JETPY-7

vani      ,      34.440,      25.739,      0.080,      8.155,      6.304,      3.639,  
 24.210

Structure [ML4 ]      SP-4      T-4      SS-4

vani      ,      30.461,      4.290,      10.800

| Complex                                  | HP-7   | HPY-7  | <b>PBPY-7</b> | COC-7 | CTPR-7 | JPBPY-7 | JETPY-7 |
|------------------------------------------|--------|--------|---------------|-------|--------|---------|---------|
| <b>Co<sub>2</sub>Cl<sub>2</sub>(Co1)</b> | 34.459 | 25.460 | <b>0.062</b>  | 8.110 | 6.265  | 3.444   | 24.559  |
| <b>Co<sub>2</sub>Br<sub>2</sub>(Co1)</b> | 34.824 | 25.575 | <b>0.056</b>  | 8.107 | 6.339  | 3.470   | 24.621  |
| <b>Co<sub>2</sub>I<sub>2</sub>(Co1)</b>  | 34.440 | 25.739 | <b>0.080</b>  | 8.155 | 6.304  | 3.639   | 24.210  |

| Complex                                  | SP-4   | <b>T-4</b>   | SS-4   |
|------------------------------------------|--------|--------------|--------|
| <b>Co<sub>2</sub>Cl<sub>2</sub>(Co2)</b> | 26.881 | <b>3.567</b> | 9.360  |
| <b>Co<sub>2</sub>Br<sub>2</sub>(Co2)</b> | 28.113 | <b>3.749</b> | 10.111 |
| <b>Co<sub>2</sub>I<sub>2</sub>(Co2)</b>  | 30.461 | <b>4.290</b> | 10.800 |

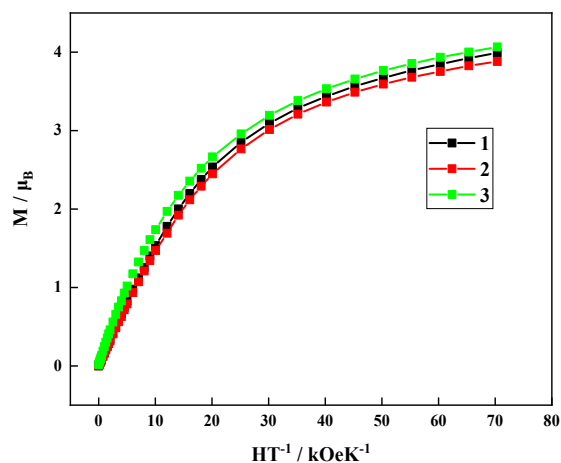

**Figure S4.** Field dependences of magnetization in the field range 0–70 kOe at 2 K temperature for 1–3.

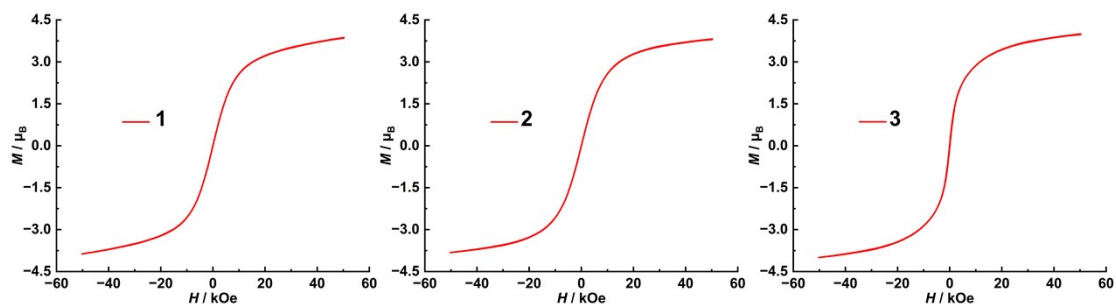

**Figure S5.**  $M(H)$  Hysteresis plots for 1–3 using a scan rate of  $2.0 \text{ mTs}^{-1}$ .

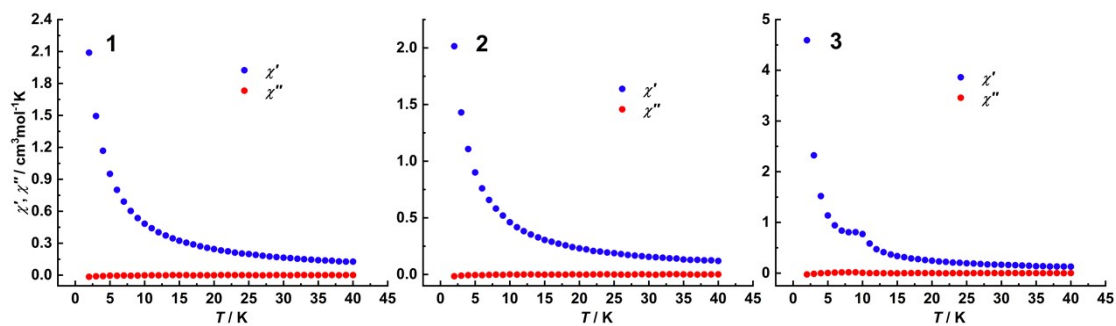

**Figure S6.** Plots of ac susceptibility vs. temperature at  $H_{ac} = 3.5 \text{ Oe}$ ,  $H_{dc} = 0 \text{ Oe}$ , oscillating at 1–1488 Hz for 1–3.

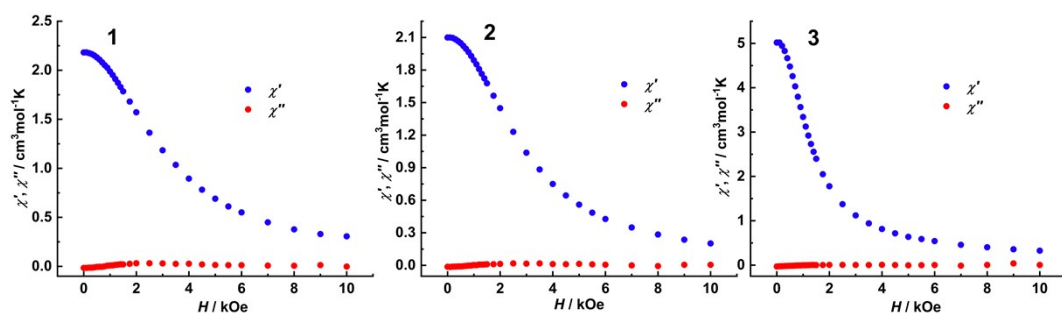

**Figure S7.** Plots of ac susceptibility vs. applied field from 0–10 kOe for 1–3.

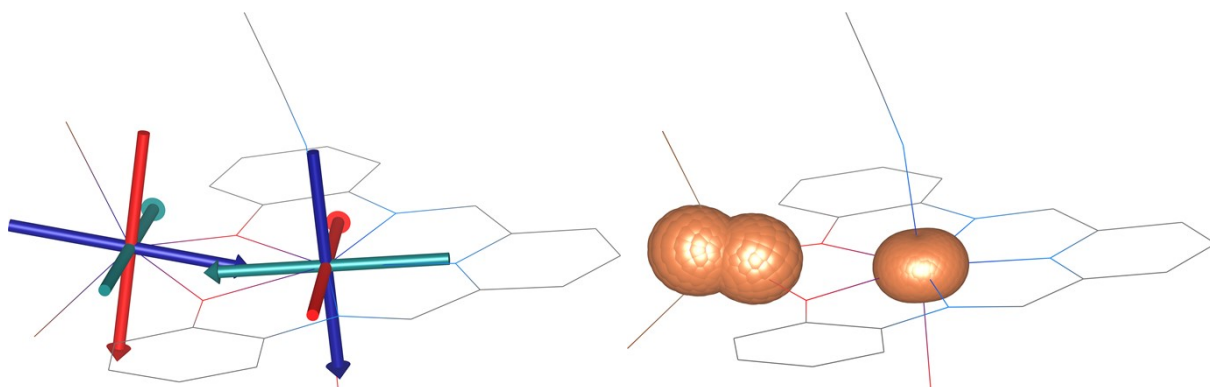

**Figure S8.** Molecular structure of 2 overlaid with a)  $D$ -tensors axes calculated with CASSCF/NEVPT2 (red/green/blue vectors represent x/y/z axes of  $D$ -tensors) on the left, b)

three-dimensional molar magnetization calculated at  $T = 2$  K and  $B = 0.1$  T on the right. The hydrogen atoms were omitted.

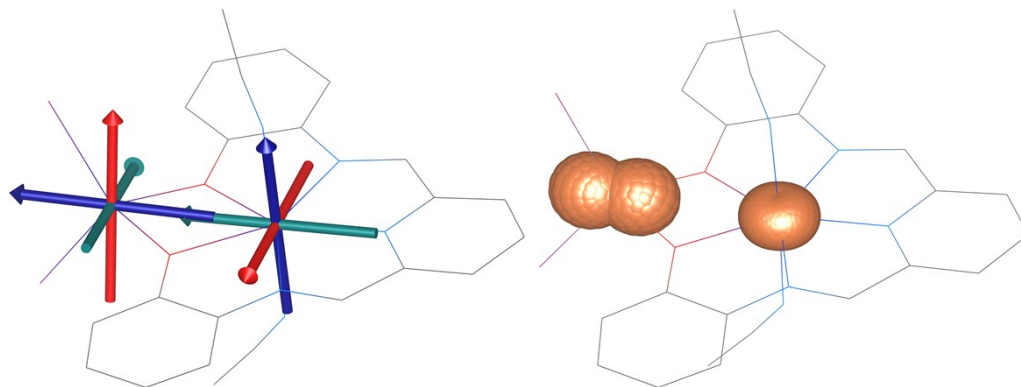

**Figure S9.** Molecular structure of **3** overlaid with a)  $D$ -tensors axes calculated with CASSCF/NEVPT2 (red/green/blue vectors represent  $x/y/z$  axes of  $D$ -tensors) on the left, b) three-dimensional molar magnetization calculated at  $T = 2$  K and  $B = 0.1$  T on the right. The hydrogen atoms were omitted.

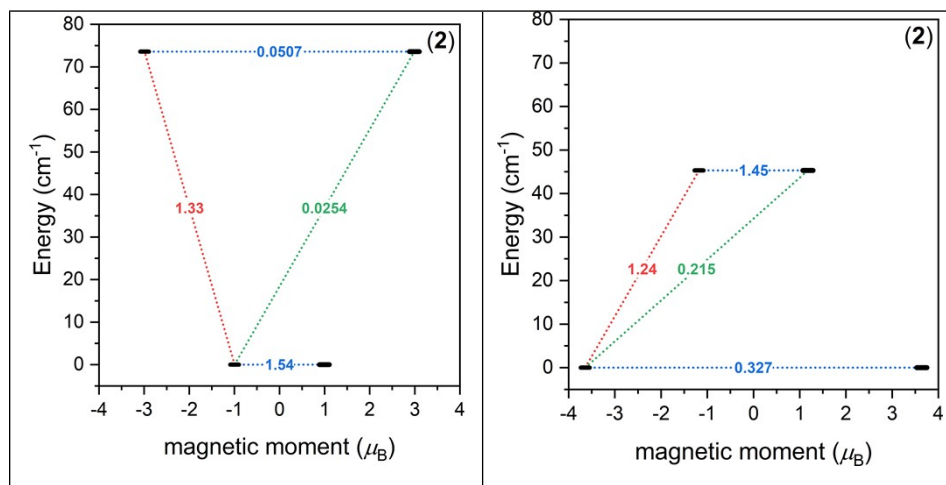

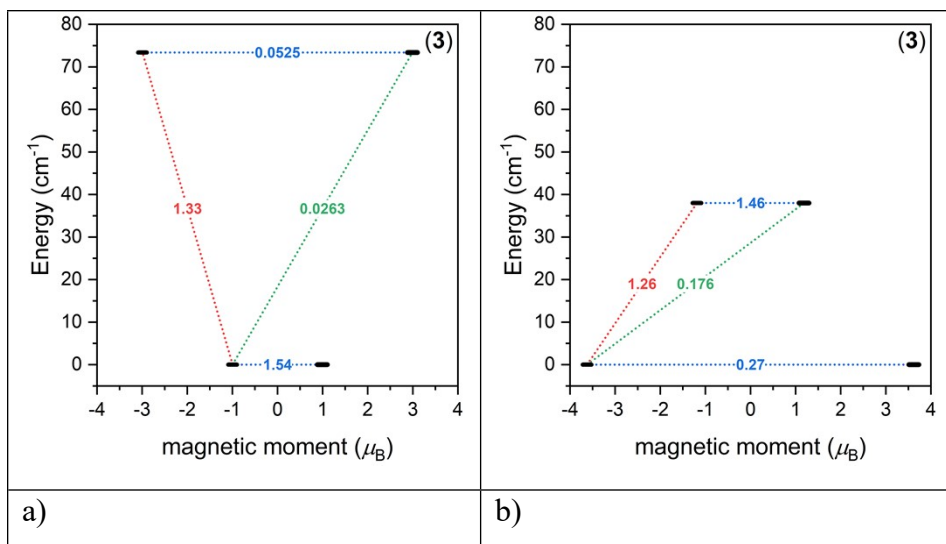

**Figure S10.** Magnetization reversal blocking barrier of pentagonal-bipyramidal Co<sup>II</sup> ion (a) and tetrahedral Co<sup>II</sup> ion (b) in **2-3** calculated by CASSCF/NEVPT2/SINGLE\_ANISO. The numbers presented for the lowest two doublets represent the corresponding matrix element of the transversal magnetic moment (for values larger than 0.1, an efficient relaxation mechanism is expected).

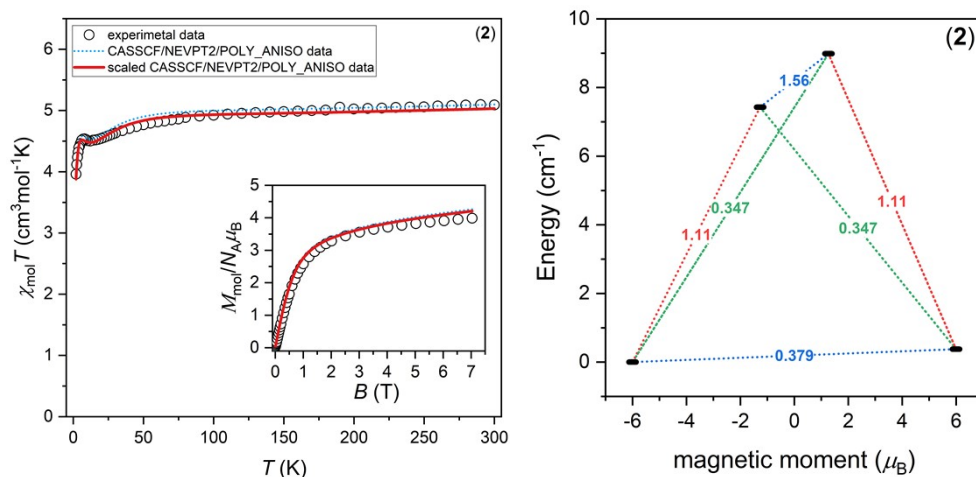

**Figure S11.** The POLY\_ANISO module analysis for **2** with  $J^{\text{Lin}} = 2.6 \text{ cm}^{-1}$ ,  $zj = -0.086 \text{ cm}^{-1}$ , and a scaling factor of 0.987. Left: temperature-dependent  $\chi_{\text{mol}}T$  product and isothermal magnetization at  $T = 1.9 \text{ K}$ . Right: magnetization reversal blocking barrier showing the two lowest pseudo-doublets. The values indicated for the two lowest doublets correspond to the corresponding matrix elements of the transversal magnetic moment. The values colored in blue show the tunneling gap  $\Delta_{\text{tun}}$  (cm<sup>-1</sup>) of the indicated pseudo-doublets.

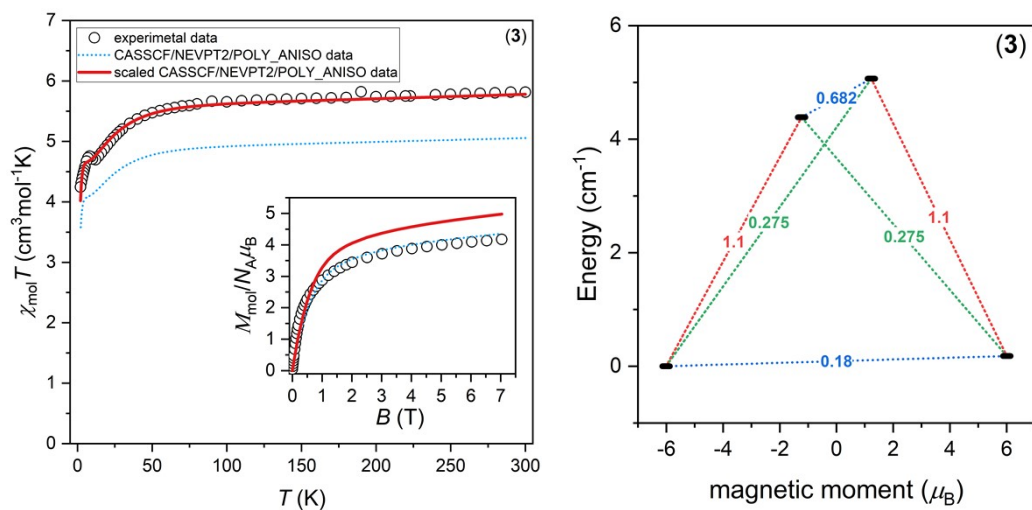

**Figure S12.** The POLY\_ANISO module analysis for **3** with  $J^{\text{Lin}} = 1.4 \text{ cm}^{-1}$ ,  $z_j = -0.14 \text{ cm}^{-1}$ , and a scaling factor of 1.14. Left: temperature-dependent  $\chi_{\text{mol}} T$  product and isothermal magnetization at  $T = 1.9$  K. Right: magnetization reversal blocking barrier showing the two lowest pseudo-doublets. The values indicated for the two lowest doublets correspond to the corresponding matrix elements of the transversal magnetic moment. The values colored in blue show the tunneling gap  $\Delta_{\text{tun}}$  ( $\text{cm}^{-1}$ ) of the indicated pseudo-doublets.
